# Supplementary material
Source: ML conference proceedings conference paper supplement (https://openreview.net/forum?id=OHgnfSrn2jv)
Supplement: supplementary_material [file attachment]

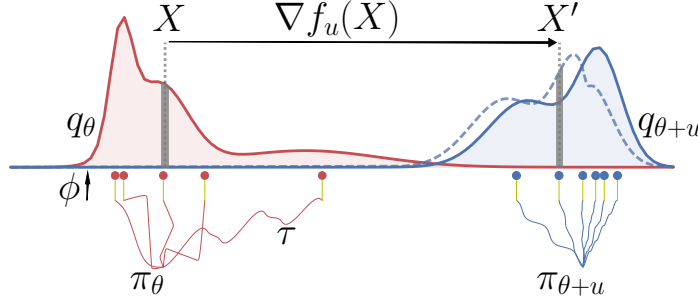

Figure 6: Wasserstein.

## A BACKGROUND

### A.1 POLICY OPTIMIZATION

An agent interacting with an environment form a system that can be described by a *state* variable  $s$  belonging to a *state space*  $\mathcal{S}$ . In the Markov Decision Process (MDP) setting, the agent can interact with the environment by taking an action  $a$  from a set of possible actions  $\mathcal{A}$  given the current state  $s$  of the system. As a consequence, the system moves to a new state  $s'$  according to a probability transition function  $P(s'|a, s)$  which describes the probability of moving to state  $s'$  given the previous state  $s$  and action  $a$ . The agent also receives a partial reward  $r$  which can be expressed as a possibly randomized function of the new state  $s'$ ,  $r = r(s')$ . The agent has access to a set of possible *policies*  $\pi_\theta(a|s)$  parametrized by  $\theta \in \mathbb{R}^p$  and that generates an action  $a$  given a current state  $s$ . Thus, each policy can be seen as a probability distribution conditioned a state  $s$ . Using the same policy induces a whole trajectory of state-action-rewards  $\tau = (s_t, a_t, r_t)_{t \geq 0}$  which can be viewed as a sample from a trajectory distribution  $\mathbb{P}_\theta$  defined over the space of possible trajectories  $\tau$ . Hence, for a given random trajectory  $\tau$  induced by a policy  $\pi_\theta$ , the agent receives a total discounted reward  $R(\tau) := \sum_{t=1}^{\infty} \gamma^{t-1} r(s_t)$  with discount factor  $0 < \gamma < 1$ . This allows to define the *value* function as the expected total reward conditioned on a particular initial state  $s$ :

$$V_\theta(s_t) = \mathbb{E}_{\mathbb{P}_\theta|s_t} \left[ \sum_{l=1}^{\infty} \gamma^{l-1} r(s_{l+t}) \right]. \quad (16)$$

When the gradient of the *score function*  $\nabla \log \pi_\theta(a|s)$  is available, the policy gradient theorem allows to express the gradient of  $\mathcal{R}(\theta)$ :

$$\nabla_\theta \mathcal{R}(\theta) = \mathbb{E}_{\mathbb{P}_\theta} \left[ \sum_{t=0}^{\infty} \gamma^t \nabla \log \pi_\theta(a_t|s_t) A_\theta(s_t, a_t) \right] \quad (17)$$

where the expectation is taken over trajectories  $\tau$  under  $\mathbb{P}_\theta$  and  $A_\theta(s, a)$  represents the *advantage* function which can be expressed in terms of the value function  $V_\theta(s)$  in terms of

$$A_\theta(s_t, a_t) = \mathbb{E}_{s_{t+1}|s_t, a_t} [r(s_{t+1}) + \gamma V_\theta(s_{t+1})] - V_\theta(s_t).$$

The agent seeks an optimal policy  $\pi_{\theta^*}$  that maximizes the expected total reward under the trajectory distribution:  $\mathcal{R}(\theta) = \mathbb{E}_{\mathbb{P}_\theta}[R(\tau)]$ .

## B WASSERSTEIN NATURAL GRADIENT

**Connection to the Fisher natural gradient and proximal methods.** Both WNG and FNG are obtained from a proximity measure between probability distributions:

**Proposition 2** Let  $D(\theta, \theta')$  be either the KL-divergence  $KL(\pi_\theta, \pi_{\theta'})$  or the Wasserstein-2 distance between the behavioral distributions  $W_2(q_\theta, q_{\theta'})$  and let  $g^D$  be either the FNG  $g^F$  or WNG  $g^W$ , then

$$g_k^D = \lim_{\beta \rightarrow +\infty} \arg \max_u \beta \left( \mathcal{L}(\theta_k + \beta^{-1}u) - \mathcal{L}(\theta_k) - \frac{\beta}{2} D(\theta_k, \theta_k + \beta^{-1}u) \right) \quad (18)$$

Equation (18) simply states that the both WNG and FNG arise as limit cases of penalized objectives provided the strength of the penalty  $\beta$  diverges to infinity and the step-size is shrunk proportionally to  $\beta^{-1}$ . An additional global rescaling by  $\beta$  of the total objective prevents it from collapsing to 0. Intuitively, performing a Taylor expansion of Equation (18) recovers an equation similar to Equation (8). Equation (18) shows that using a penalty that encourages **global** proximity between successive policies, it is possible to recover the **local** geometry of policies (captured by the local ) by increasing the strength of the penalty using appropriate re-scaling. This also informally shows why both natural gradients are said to be invariant to re-parametrization ((Arbel et al., 2020, Proposition 1)), since both KL and  $W_2$  remains unchanged if  $q_\theta$  is parameterized in a different way.

## C ALGORITHM FOR ESTIMATING WNG

---

### Algorithm 3: Efficient Wasserstein Natural Gradient

---

- 1: **Input** mini-batch of samples  $\{X_n\}_{n=1}^N$  distributed according to  $q_\theta$ , gradient direction  $\hat{g}$ , basis functions  $h_1, \dots, h_M$ , regularization parameter  $\epsilon$ .
  - 2: **Output** Wasserstein Natural gradient  $\hat{g}^W$
  - 3: Compute a matrix  $C$  of shape  $M \times Nd$  using  $C_{m,(n,i)} \leftarrow \partial_i h_m(X_n)$ .
  - 4: Compute similarity matrix  $L \leftarrow \frac{1}{N} C C^T$ .
  - 5: Compute surrogate vector  $V$  using Equation (11).
  - 6: **for** iteration= 1, 2, ...  $M$  **do**
  - 7:   Use automatic differentiation on  $V_m$  to compute Jacobian matrix  $J$  in Equation (10).
  - 8: **end for**
  - 9: Compute a matrix  $D$  of shape  $M \times M$  using  $D \leftarrow J J^T + \epsilon L$ .
  - 10: Compute a vector  $b$  of size  $M$  using  $b \leftarrow J \hat{g}$ .
  - 11: Solve linear system of size  $M$  :  $b \leftarrow \text{solve}(D, b)$
  - 12: Return  $\hat{g}^W \leftarrow \frac{1}{\epsilon} (\hat{g} - J^T b)$
- 

---

### Algorithm 4: Similarity

---

- 1: **Input**  $N, M, K, \hat{g}, \epsilon$
- 2: **Output**  $\hat{g}^W$
- 3: Get a minibatch of samples  $Z_1, \dots, Z_N$ .
- 4: Compute embedded samples  $X_i = B_\theta(Z_i) \in \mathbb{R}^d$
- 5: Randomly sample  $Y_1, \dots, Y_M$  from  $X_1, \dots, X_N$  without replacement
- 6: Randomly sample indices  $i_1, \dots, i_M$  from  $\{1, \dots, p\}$  without replacement
- 7: Compute a similarity matrix  $C$  of shape  $M \times Nd$ :

$$C_{m,(n,i)} \leftarrow \partial_{i_m} \partial_{i+d} K(Y_m, X_n) \quad (19)$$

- 8: Compute a summary vector  $V$  of size  $M$

$$V_m \leftarrow \frac{1}{N} \sum_{i=1}^N \partial_{i_m} K(Y_m, X_n) \quad (20)$$

- 9: **for** iteration= 1, 2, ...  $M$  **do**
  - 10:   Using automatic differentiation compute the gradient of  $V_m$  w.r.t  $\theta \in \mathbb{R}^p$ .
  - 11:   Collect gradients in a Jacobian matrix  $J$  of shape  $M \times p$ .
  - 12: **end for**
  - 13: Compute a matrix  $G$  of shape  $M \times M$  using  $G \leftarrow J J^T + \frac{\epsilon}{N} C C^T$ .
  - 14: Collect product  $J \hat{g}$  in a vector  $\tilde{g}$  of shape  $M$ .
  - 15: Solve linear system of size  $M$  :  $b \leftarrow \text{solve}(G, \tilde{g})$
  - 16: Return  $\frac{1}{\epsilon} (\hat{g} - J^T b)$
-

## D ADDITIONAL TECHNICAL DETAILS

Consider a policy  $\pi_\theta$  and denote by  $\mathcal{R}(\tau)$  the reward of a sample  $\tau$  from  $\mathbb{P}_{\pi_\theta}$ . The agent tries to maximize the expected reward:

$$l(\theta) = \mathbb{E}_{\mathbb{P}_{\pi_\theta}} [\mathcal{R}(\tau)]. \quad (21)$$

We are interested in the setting where  $l(\theta)$  is maximized using stochastic gradient methods while maintaining a small Wasserstein distance between successive Behavioral distributions. More precisely, denote by  $\Phi$  the Behavioral Embedding Map as in [Pacchiano et al. \(2019\)](#) which maps a trajectory  $\tau$  to a feature (*final state, actions* or *total reward*) and let  $\mathbb{P}_{\pi_\theta}^\phi$  be the push-forward distribution of  $\mathbb{P}_{\pi_\theta}$  by  $\phi$  as in [Pacchiano et al. \(2019\)](#). We would like to ensure that  $W_2(\mathbb{P}_{\pi_{\theta_{k+1}}}^\phi, \mathbb{P}_{\pi_{\theta_k}}^\phi)$  remains small between two successive iterates  $\theta_k$  and  $\theta_{k+1}$ .

To this end, [Pacchiano et al. \(2019\)](#) consider the penalized objective:

$$f(\theta) := -l(\theta) + \frac{\beta}{2} WD_\lambda(\mathbb{P}_{\pi_\theta}^\phi, \mathbb{P}_{\pi_{\theta_k}}^\phi) \quad (22)$$

Where  $WD_\lambda$  is the entropy regularized Wasserstein distance, with regularization parameter  $\lambda > 0$ . Hence, minimizing  $f$  in  $\theta$  gives the next iterate  $\theta_{k+1}$  while maintaining a small distance  $WD_\lambda(\mathbb{P}_{\pi_{\theta_{k+1}}}^\phi, \mathbb{P}_{\pi_{\theta_k}}^\phi)$ . However, this process is costly since each iteration requires minimizing Equation (22). Instead, we propose to use the Wasserstein Natural gradient estimator introduced in [Arbel et al. \(2020\)](#) which is formally obtained by letting  $\beta$  tends to  $\infty$ . In this case, Equation (22) is replaced by the following cost:

$$f(\theta) := -\nabla l(\theta_k)^\top (\theta - \theta_k) + \frac{\beta}{2} (\theta - \theta_k)^\top G(\theta_k) (\theta - \theta_k) \quad (23)$$

where  $G(\theta_k)$  is the Wasserstein Information Matrix. Minimizing Equation (23) gives the following update:

$$\theta_{k+1} = \theta_k + \beta G(\theta_k)^{-1} \nabla l(\theta_k). \quad (24)$$

While computing and inverting  $G(\theta_k)^{-1}$  in closed form is expensive, [Arbel et al. \(2020\)](#) shows that scalable approximation to Equation (24) are obtained using:

$$\theta_{k+1} = \theta_k + \frac{\beta}{\epsilon} (\nabla l(\theta_k) - M_{\theta_k}(f^*)) \quad (25)$$

where  $\epsilon > 0$  is a regularization parameter and  $M_\theta(f)$  is a vector whose components are given by:

$$M_\theta(f)_i = \lim_{\gamma} \gamma^{-1} \left( \mathbb{E}_{\mathbb{P}_{\pi_{\theta+\gamma e_i}}} [f(\phi(\tau))] - \mathbb{E}_{\mathbb{P}_{\pi_\theta}} [f(\phi(\tau))] \right) \quad (26)$$

and  $f^*$  is obtained by minimizing the objective  $\mathcal{J}(f)$  over an RKHS space:

$$\mathcal{J}(f) := \mathbb{E}_{\mathbb{P}_{\pi_\theta}} [\|\nabla f(\phi(\tau))\|^2] + \frac{1}{\epsilon} \|\nabla l(\theta_k) - M_{\theta_k}(f)\|^2 + \lambda \|f\|_{\mathcal{H}}^2 \quad (27)$$

To figure out exact expression of the updates, it remains to find explicit expressions for  $M_\theta(f)$ . We distinguish two cases **gradient-based optimization** and **gradient-free optimization**.

### D.1 GRADIENT-BASED OPTIMIZATION

When the trajectories  $\tau$  are obtained through an mapping  $h_\theta(z, s) := \tau$  where  $z$  is a latent noise and  $s$  is a state, then [Arbel et al. \(2020\)](#) shows that  $M_\theta(f)$  is expressed in terms of the jacobian of  $h_\theta$ :

$$M_\theta(f) = \mathbb{E}_{Z, S} [\nabla f(h_\theta(Z, S)) \nabla_\theta h_\theta(Z, S)] \quad (28)$$

This leads to the algorithm implemented in [Arbel et al. \(2020\)](#).

Sometimes the mapping  $h_\theta(z, s) := \tau$  is not differentiable neither is the cost  $\theta$ . In this case, it advantageous to use Evolution Strategies. In our setting, this means that the policy  $\pi_\theta$  is replaced by a perturbed policy  $\pi_\psi$  where  $\psi$  is a sample from a gaussian  $p_{\theta, \sigma}$  with mean  $\theta$  and variance  $\sigma$ . This

allows to obtain gradient wrt  $\theta$  after smoothing by averaging over several draws  $\psi$ . More precisely, the loss  $l$  is replaced by the averaged loss  $\bar{l}(\theta)$ :

$$\bar{l}(\theta) = \mathbb{E}_{\psi \sim p_{\theta, \sigma}} [l(\psi)]. \quad (29)$$

with gradient simply given by:

$$\nabla \bar{l}(\theta) := \frac{1}{\sigma} \mathbb{E}_{\psi \sim p_{\theta, \sigma}} [l(\psi)(\psi - \theta)] \quad (30)$$

Moreover, the vector  $M_\theta(f)$  is replaced by an averaged one:

$$\bar{M}_\theta(f)_i = \lim_{\gamma} \gamma^{-1} \left( \mathbb{E}_{\psi \sim p_{\theta + \gamma e_i, \sigma}} [\mathbb{E}_{\mathbb{P}_{\pi_\psi}} [f(\phi(\tau))]] - \mathbb{E}_{\psi \sim p_{\theta, \sigma}} [\mathbb{E}_{\mathbb{P}_{\pi_\psi}} [f(\phi(\tau))]] \right) \quad (31)$$

In this case it is easy to see that  $\bar{M}_\theta(f)$  admits a simple expression:

$$\bar{M}_\theta(f) = \frac{1}{\sigma} \mathbb{E}_{\psi \sim p_{\theta, \sigma}} [\mathbb{E}_{\mathbb{P}_{\pi_\psi}} [f(\phi(\tau))](\psi - \theta)] \quad (32)$$

Finally, the objective in Equation (27) is replaced by an averaged one  $\bar{\mathcal{J}}(f)$ :

$$\bar{\mathcal{J}}(f) := \mathbb{E}_{\psi \sim p_{\theta, \sigma}} \mathbb{E}_{\mathbb{P}_{\pi_\psi}} [\|\nabla f(\phi(\tau))\|^2] + \frac{1}{\epsilon} \|\nabla \bar{l}(\theta_k) - \bar{M}_{\theta_k}(f^*)\|^2 + \lambda \|f\|_{\mathcal{H}}^2 \quad (33)$$

This avoids computing the jacobian wrt to  $h_\theta(Z, S)$  which might be unknown. Finally, minimizing  $\bar{\mathcal{J}}(f)$  can be done using Nystrom methods as in [Arbel et al. \(2020\)](#).

**Expression of the estimator** Let  $\psi^n$  be noisy parameters with mean  $\theta$  and  $X_n$  the corresponding behavioral embeddings. Let  $(Y_m)_{1 \leq m \leq M}$  be  $M$  uniform subsamples from  $(X_n)_{1 \leq n \leq N}$ . The estimator of the natural gradient is given by:

$$\widehat{\nabla^W \mathcal{L}(\theta)} = \frac{1}{\epsilon} \left( D(\theta)^{-1} - D(\theta)^{-1} T^\top \left( T D(\theta)^{-1} T^\top + \lambda \epsilon K + \frac{\epsilon}{N} C C^\top \right)^\dagger T D(\theta)^{-1} \right) \widehat{\nabla \mathcal{L}(\theta)}, \quad (34)$$

where  $C$  and  $K$  are matrices in  $\mathbb{R}^{M \times Nd}$  and  $\mathbb{R}^{M \times M}$  given by

$$C_{m, (n, i)} = \partial_{i_m} \partial_{i+d} k(Y_m, X_n), \quad K_{m, m'} = \partial_{i_m} \partial_{i_{m'}+d} k(Y_m, Y_{m'}), \quad (35)$$

while  $T$  is a matrix in  $\mathbb{R}^{M \times q}$  given by:

$$T = \frac{1}{N\sigma} \sum_{i=1}^N \partial_{i_m} k(Y_m, X_n) (\psi^n - \theta) \quad (36)$$

The matrix  $D(\theta)$  is diagonal and can be computed in a similar way as in [Arbel et al. \(2020\)](#).

## E ADDITIONAL EXPERIMENTAL DETAILS

### E.1 POLICY GRADIENT TASKS

We conserve all baseline and shared hyperparameters used by [Pacchiano et al. \(2019\)](#). More precisely, for each task we ran a hyperparameter sweep over learning rates in the set  $\{1e-5, 5e-5, 1e-4, 3e-4\}$ , and used the concatenation-of-actions behavioral embedding  $\Phi(\tau) = [a_0, a_1, \dots, a_T]$  with the base network implementation the same as [Dhariwal et al. \(2017\)](#).

The WNG hyperparameters were also left the same as in [Arbel et al. \(2020\)](#).

### E.2 EVOLUTION STRATEGIES TASKS

As with the policy gradient tasks, we conserved all baseline and shared hyperparameters used by [Pacchiano et al. \(2019\)](#). Specifically, for the point task, we set the learning rate to be  $\eta = 0.1$ , the standard deviation of the noise to be  $\sigma = 0.01$ , the rollout length  $H$  was 50 time steps, and the behavioral embedding function to be the last state  $\Phi(\tau) = s_H$ . For the quadruped task we set  $\eta = 0.02$ ,  $\sigma = 0.02$ ,  $H = 400$ , and  $\Phi(\tau) = \sum_{t=0}^H r_t \left( \sum_{i=0}^t e_i \right)$  (reward-to-go encoding; see [Pacchiano et al. \(2019\)](#) for more details). Both tasks used 1000-dimensional random features and embeddings from the  $n = 2$  previous policies to compute the WD.

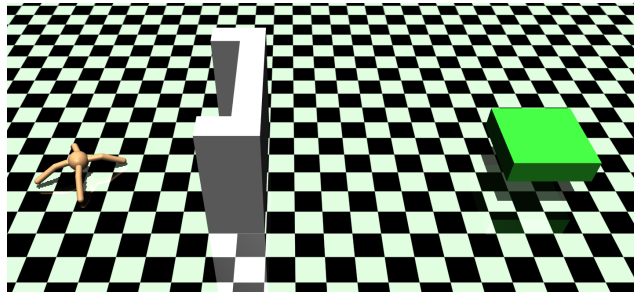

Figure 7: A visualization of the quadruped task. The agent receives more reward the closer it is to the goal (green). A naïve agent will get stuck in the local maximum at the wall if it attempts to move directly to the goal.
